# Supplementary material for: Development and validation of a new sensor for methomyl detection
Source: Royal Society of Chemistry journal article supplement (doi:10.1039/c3ay40332g), 2013-01-01
Supplement: c3ay40332g.pdf [file c3ay40332g.pdf]

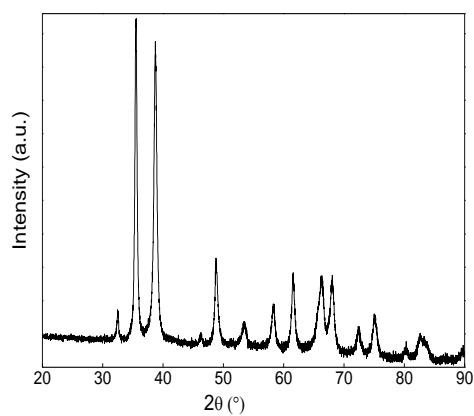

**Fig. S1** XRD diffractogram of copper oxide (CuO).

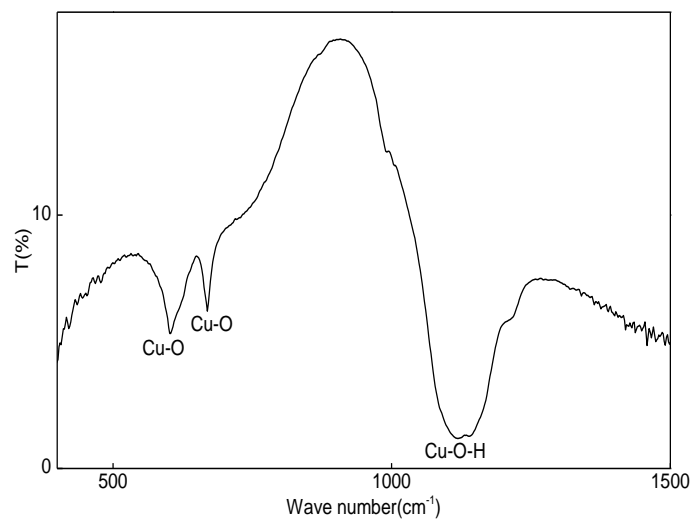

**Fig. S2** FTIR spectrum of copper oxide.

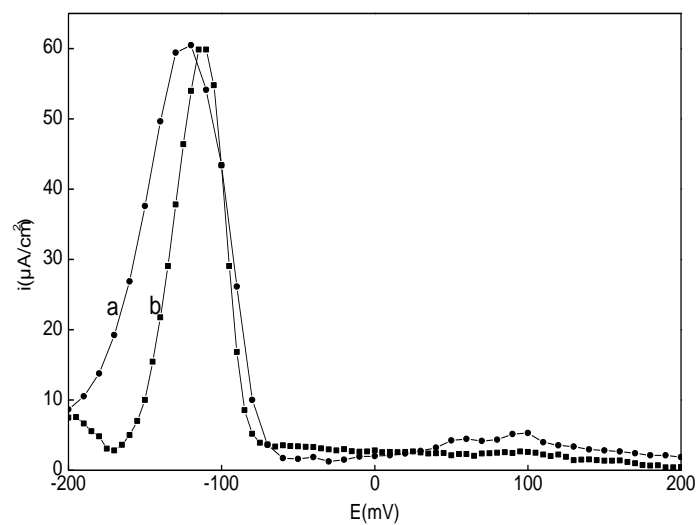

**Fig. S3** Optimization of the SWV parameters (a) step potential: 25 mV, amplitude: 10 mV, duration: 1 s and scan rate  $10 \text{ mV s}^{-1}$ , (b) step potential: 25 mV, amplitude: 5 mV, duration: 5 s and scan rate  $1 \text{ mV s}^{-1}$ .

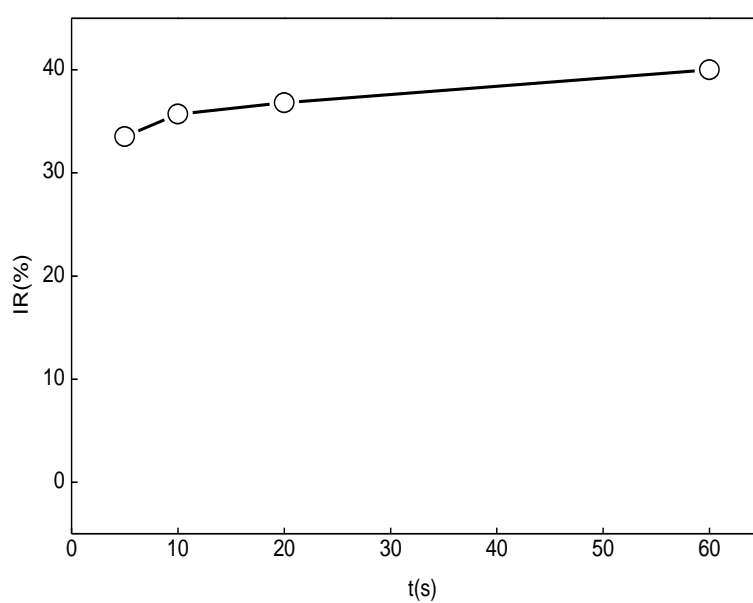

**Fig. S4** Influence of the pre-concentration time on the inhibition percentage.

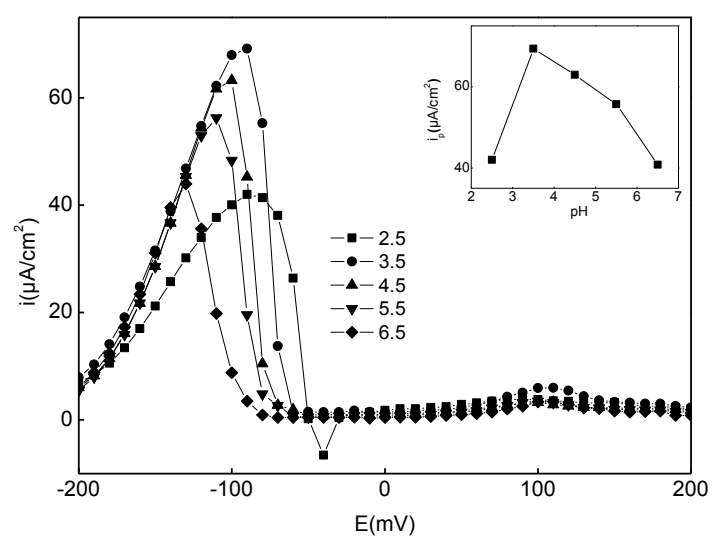

**Fig. S5** Influence of pH on the voltammetric response of Cu-CPE (50% CuO).

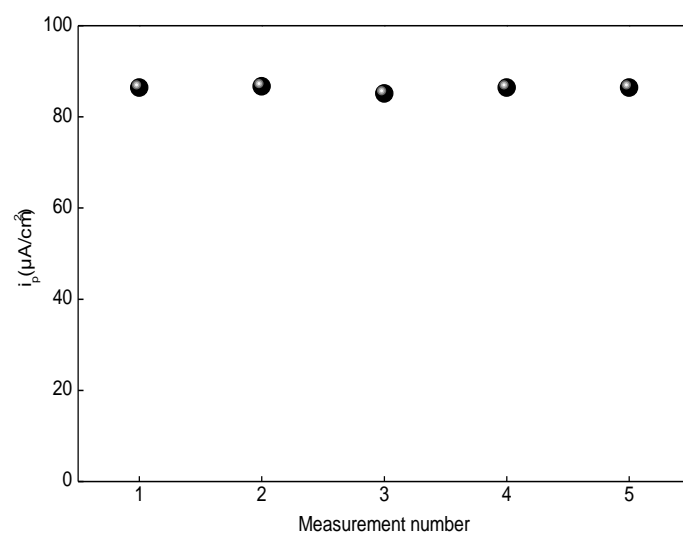

**Fig. S6** Reproducibility of the base signal

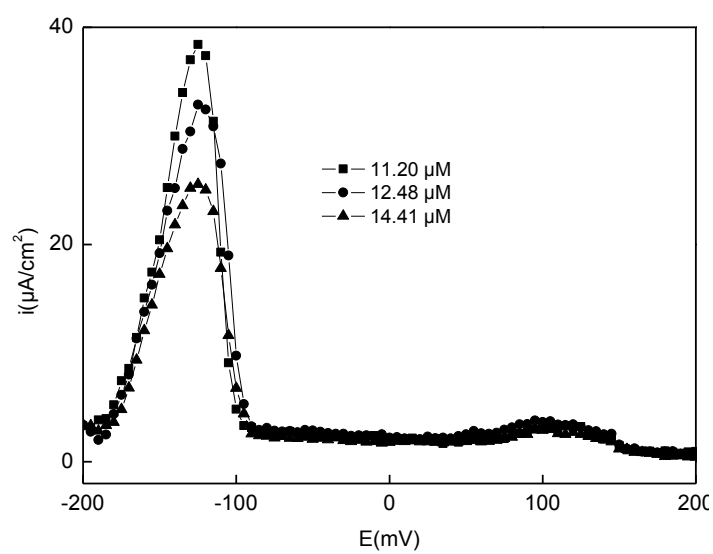

**Fig. S7** Recovery study from river water using Cu-CPE (50% CuO), and adding methomyl standard solutions at three different concentrations.

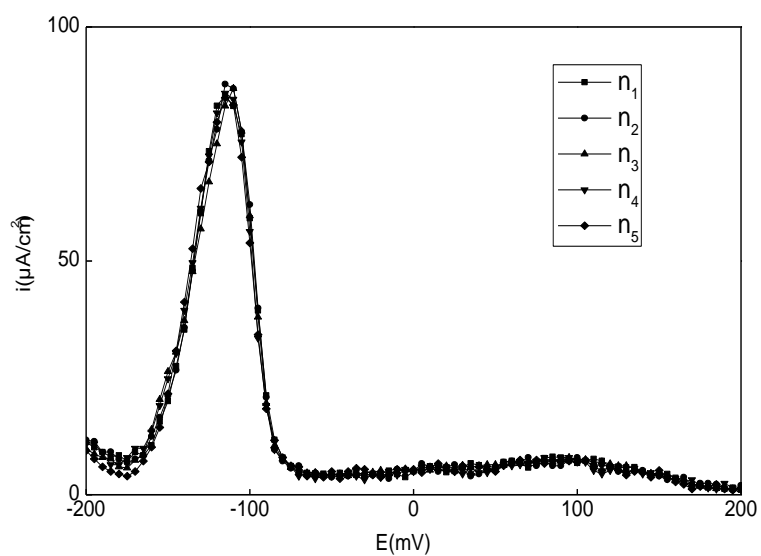

**Fig. S8** Voltammetric response of Cu-CPE (50% CuO) in presence of  $3.7 \times 10^{-5} \text{ mol L}^{-1}$  methomyl oxime and different interfering species : ( $n_1$ )  $\text{As}^-$ (1:1),  $\text{F}^-$ (1:1),  $\text{Cl}^-$ (1:1),  $\text{NO}_3^-$ (1:1),  $\text{Cr}_2\text{O}_7^{2-}$ (1:1),  $\text{NH}_4^+$ (1:1),  $\text{Zn}^{2+}$ (1:1),  $\text{Na}^+$ (1:1),  $\text{Pb}^{2+}$  (1:1),  $\text{Cd}^{2+}$ (1:1),  $\text{Ca}^{2+}$ (1:1),  $\text{Mg}^{2+}$ (1:1),  $\text{Fe}^{3+}$ (1:1),  $\text{Hg}^{2+}$ (1:1), ( $n_2$ ) dithiocarbamate (1:10), ( $n_3$ ) cysteine (1:10), ( $n_4$ ) phenol (1:10), ( $n_5$ ) glucose (1:10).



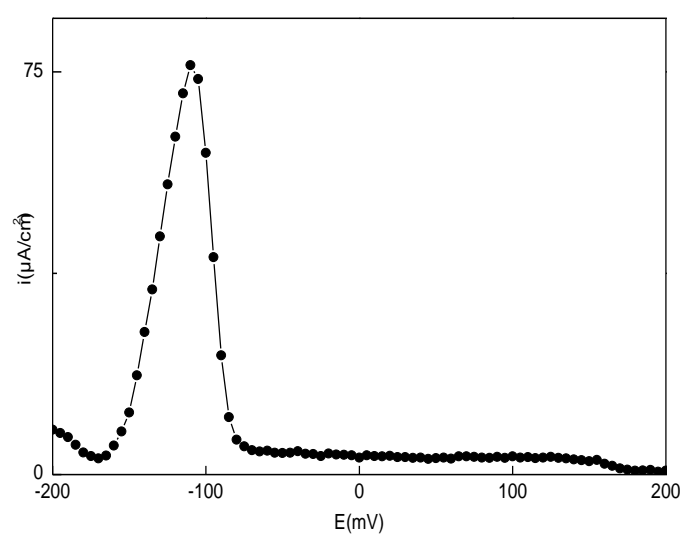

**Fig. S9** Voltammetric response of Cu-CPE (50% CuO) in ground water

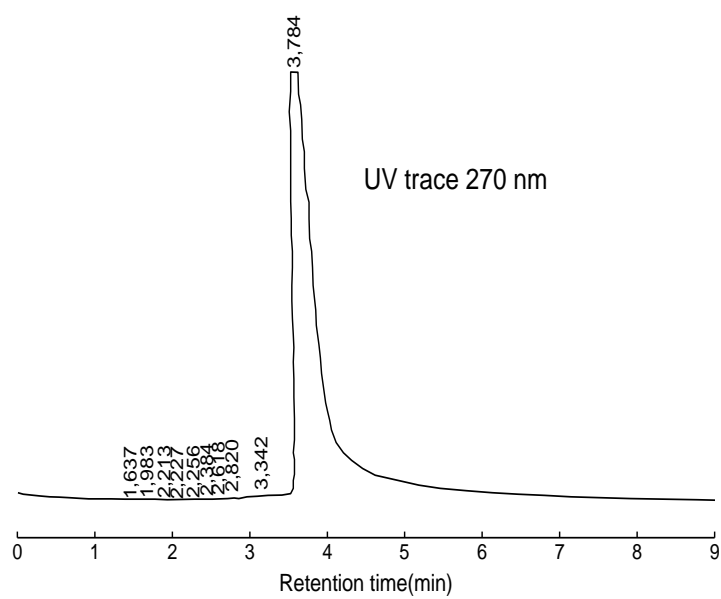

**Fig. S10** Chromatogram obtained from ground water sample
